# Supplementary material for: Circulatory Astrocyte and Neuronal EVs as Potential Biomarkers of Neurological Dysfunction in HIV-Infected Subjects and Alcohol/Tobacco Users
Source: Diagnostics (Basel). 2020 May 28;10(6):349. doi: 10.3390/diagnostics10060349 (PMC7345258; doi:10.3390/diagnostics10060349)

# **Circulatory Astrocyte and Neuronal EVs as Potential Biomarkers of Neurological Dysfunction in HIV-Infected Subjects and Alcohol/Tobacco Users**

Sunitha Kodidela <sup>1</sup>, Kelli Gerth <sup>1</sup>, Namita Sinha <sup>1</sup>, Asit Kumar <sup>1</sup>, Prashant Kumar <sup>2</sup> and Santosh Kumar \*

- 1 College of Pharmacy, Department of Pharmaceutical sciences, University of Tennessee Health Science Center, 881 Madison Ave, Memphis, TN, 38163, USA; skodidel@uthsc.edu (S.K.); kgerth1@uthsc.edu (K.G.); nsinha2@uthsc.edu (N.S.); akumar23@uthsc.edu (A.K.)
- 2 Department of Pediatrics, University of Tennessee Health Science Center and Le Bonheur Children's Hospital, Memphis, TN 38103, USA; pkumar21@uthsc.edu

\*Correspondence: ksantosh@uthsc.edu; Tel.: 901-448-7157-1

**Figure A1: Original Western blots of expression of neuronal and astrocyte marker proteins in plasma EV of Healthy and HIV-positive subjects.**

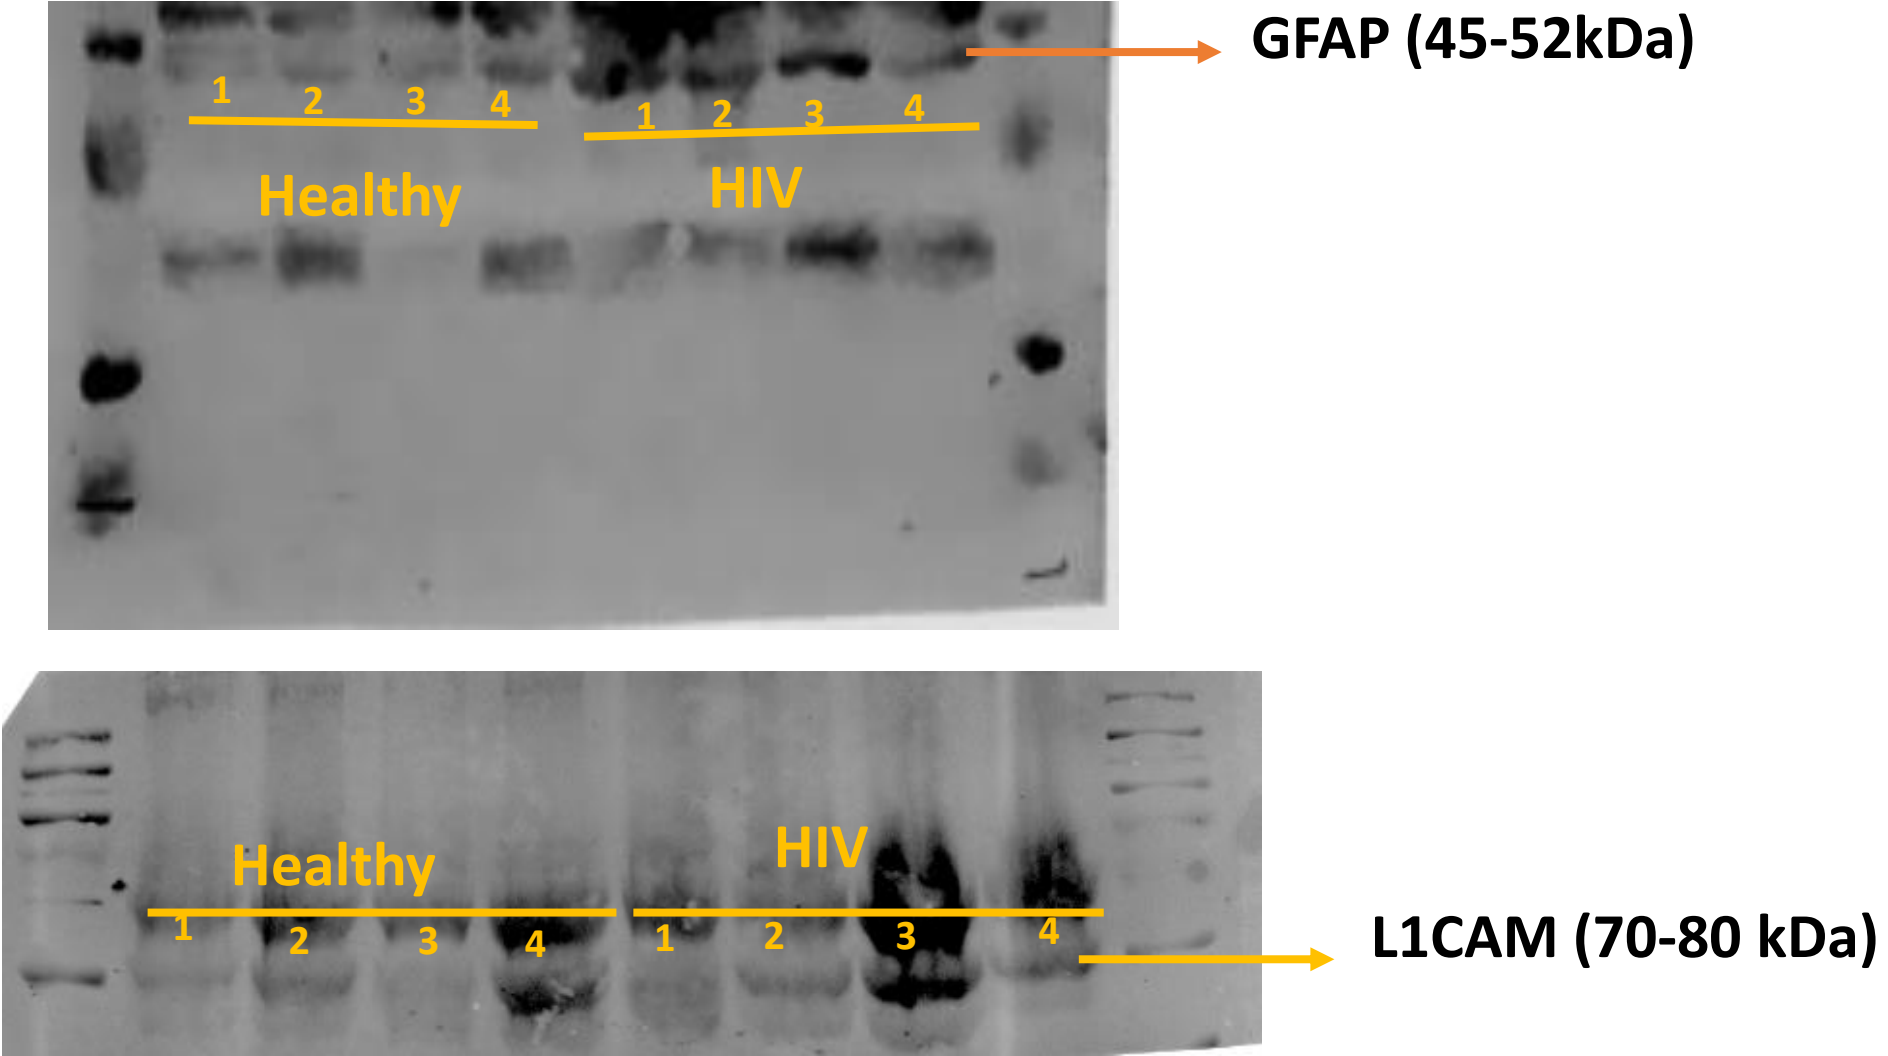

**Figure A2: Original Western blots of expression of GFAP and L1CAM in plasma EVs of healthy and substance users.**

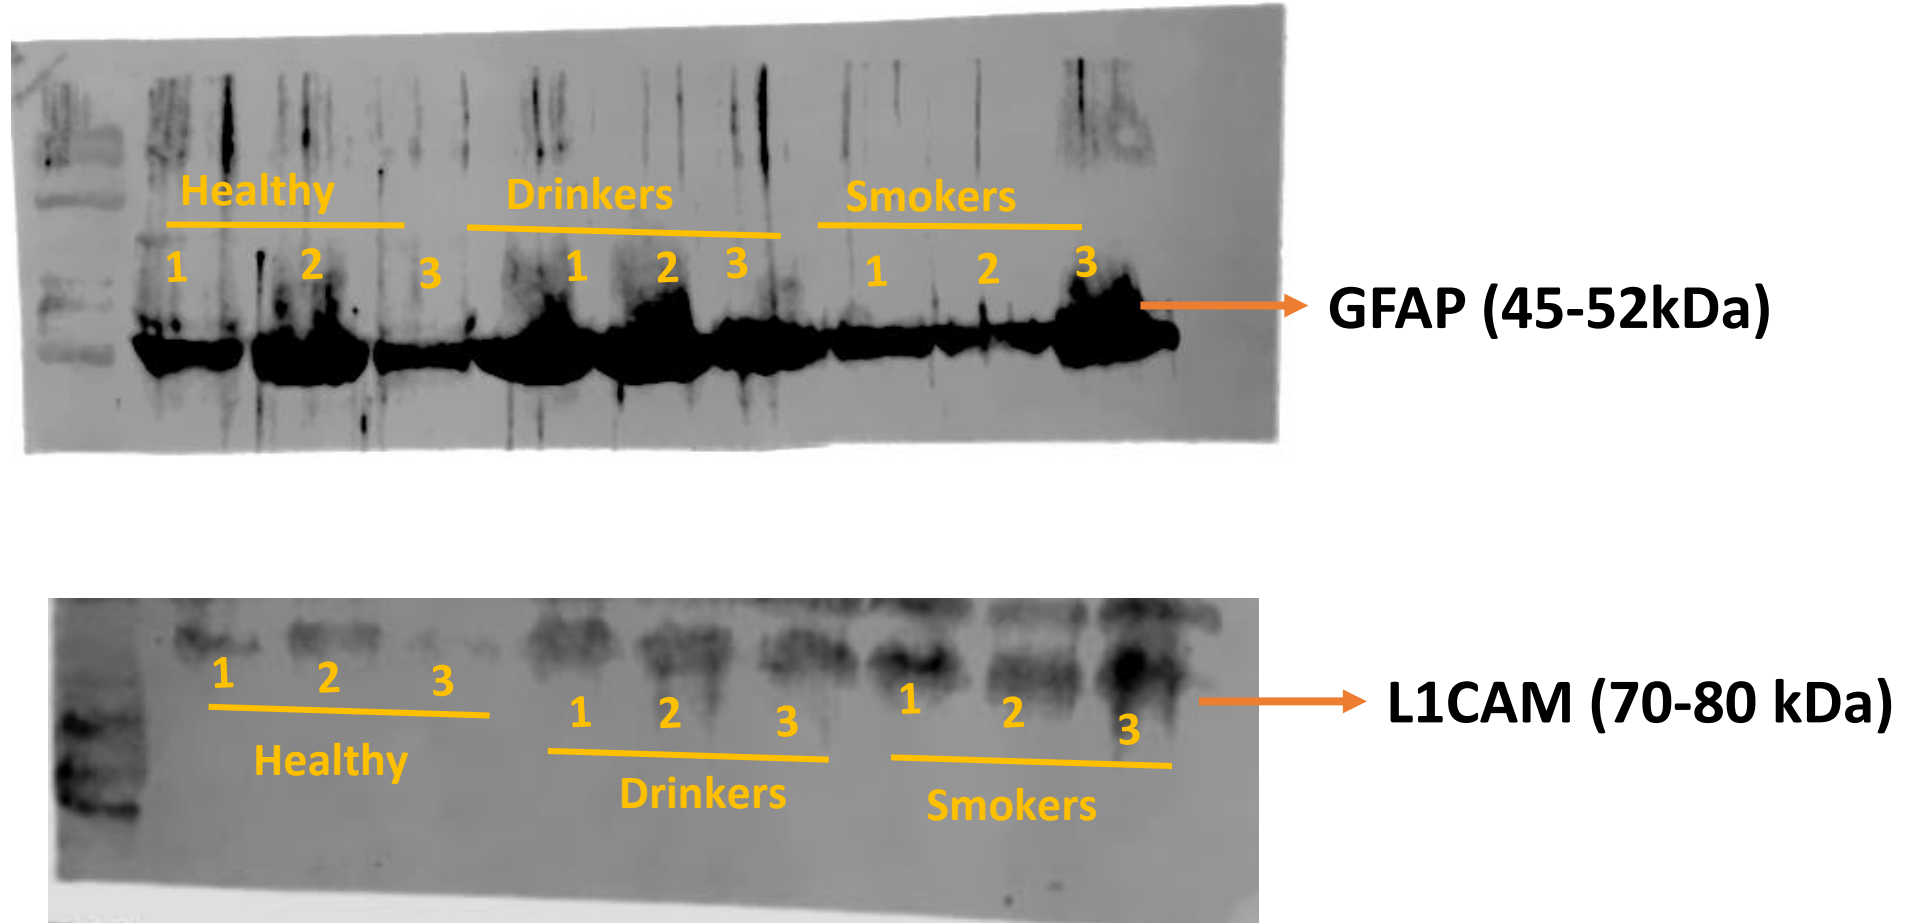

**Figure A3: Original Western blots of expression of neuronal and astrocyte proteins in plasma EVs of HIV-positive subjects with and without substance use.**

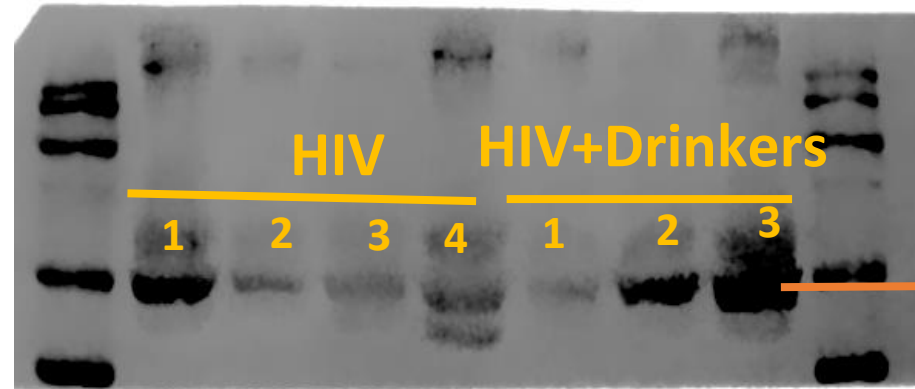

**GFAP (45-52kDa)**

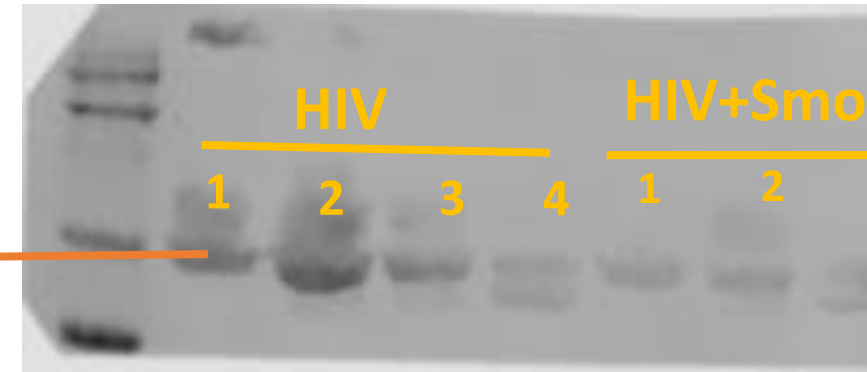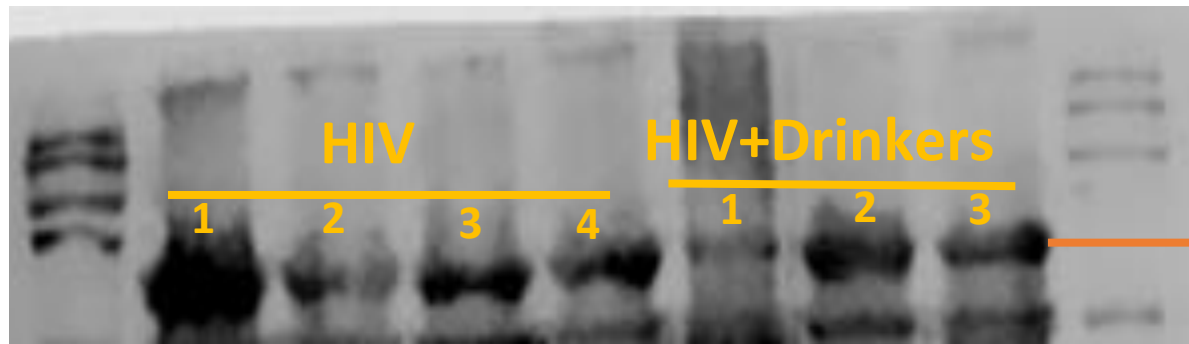

**L1CAM (70-80 kDa)**

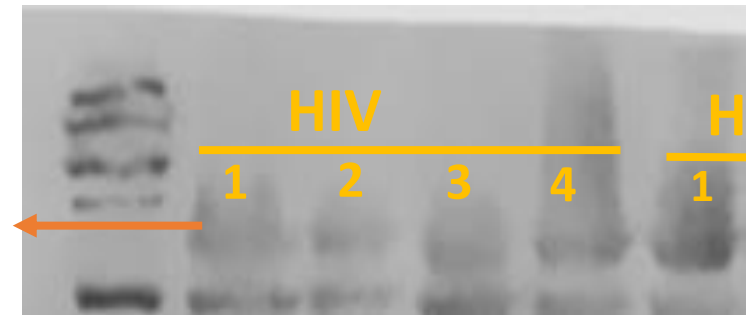

Supplement: Supplementary file 1 [file diagnostics-10-00349-s001.pdf]
